# Supplementary material for: Assessment of Artificial and Natural Transport Mechanisms of Ice Nucleating Particles in an Alpine Ski Resort in Obergurgl, Austria
Source: PubMed Central journal article supplement (PMC6788259; doi:10.3389/fmicb.2019.02278), 2019-10-04
Supplement: Data_Sheet_1.pdf [file Data_Sheet_1.pdf]

# 1 Supplementary Information

**SI-Table 1: ANOSIM, ADONIS and pairwise PERMANOVA for Sample Types**

| SampleType                   | Bacteria |                   |                    |                       |                  | Fungi    |                    |                    |                       |                  |
|------------------------------|----------|-------------------|--------------------|-----------------------|------------------|----------|--------------------|--------------------|-----------------------|------------------|
| ANOSIM (bray)                | R=0.962  | <b>p=0.001</b>    |                    |                       |                  | R=0.7498 | <b>p=0.001</b>     |                    |                       |                  |
| ADONIS (bray)                | Df=5     | MeanSqs:<br>0.060 | F-Model:<br>13.153 | R <sup>2</sup> =0.868 | <b>p=0.001</b>   | Df=5     | MeanSqs:<br>0.5682 | F-Model:<br>2.6965 | R <sup>2</sup> =0.574 | <b>p=0.001</b>   |
| Pairwise (bray)<br>PERMANOVA | Df       | F-Model           | R <sup>2</sup>     | p                     | p adj.<br>(holm) | Df       | F-Model            | R <sup>2</sup>     | p                     | p adj.<br>(holm) |
| piste vs fresh               | 8        | 3.8334            | 0.3538             | <b>0.010</b>          | <b>0.050</b>     | 8        | 1.9879             | 0.2212             | <b>0.013</b>          | 0.052            |
| piste vs pond                | 6        | 13.4051           | 0.7283             | <b>0.034</b>          | 0.102            | 6        | 4.7962             | 0.4895             | <b>0.031</b>          | 0.093            |
| piste vs artificial          | 5        | 18.3371           | 0.8209             | 0.100                 | 0.200            | 5        | 2.2994             | 0.3650             | 0.100                 | 0.182            |
| fresh vs pond                | 9        | 18.9790           | 0.7035             | <b>0.005</b>          | <b>0.030</b>     | 9        | 5.4742             | 0.4063             | <b>0.004</b>          | <b>0.024</b>     |
| fresh vs artificial          | 8        | 18.8756           | 0.7295             | <b>0.010</b>          | <b>0.050</b>     | 8        | 2.4731             | 0.2612             | <b>0.010</b>          | <b>0.050</b>     |
| pond vs artificial           | 6        | 2.1282            | 0.2986             | 0.141                 | 0.200            | 6        | 1.7365             | 0.2578             | 0.091                 | 0.182            |

All values calculated from the thirdroot transformed, 97% most common OTU filtered, genus level datasets  
 Pairwise PERMANOVA(bray): samples fresh snow 1 & 2 resp. pond and river were grouped together to “fresh” and “pond” to lower number of comparisons, holm p-value correction was applied

**SI-Table 2: Relative abundance of ten most abundant bacterial phyla and fungal classes**

| Bacteria           | Aged Piste Snow | Artificial snow | Fresh snow1 | Fresh snow2 | Pond pump | River  |
|--------------------|-----------------|-----------------|-------------|-------------|-----------|--------|
| Acidobacteria      | 8.87%           | 3.34%           | 8.51%       | 10.06%      | 0.32%     | 3.58%  |
| Actinobacteria     | 10.05%          | 6.79%           | 13.92%      | 14.69%      | 1.19%     | 6.98%  |
| Bacteroidetes      | 4.32%           | 6.16%           | 6.45%       | 4.99%       | 1.88%     | 6.49%  |
| Chloroflexi        | 1.27%           | 1.14%           | 6.85%       | 9.16%       | 0.10%     | 0.85%  |
| Cyanobacteria      | 13.91%          | 0.65%           | 26.87%      | 31.34%      | 0.31%     | 0.82%  |
| Firmicutes         | 2.48%           | 1.29%           | 1.49%       | 1.32%       | 0.32%     | 0.48%  |
| Patescibacteria    | 0.03%           | 10.39%          | 0.04%       | 0.03%       | 5.82%     | 36.36% |
| Planctomycetes     | 0.38%           | 4.93%           | 0.44%       | 0.51%       | 2.24%     | 1.50%  |
| Proteobacteria     | 58.01%          | 64.79%          | 34.44%      | 27.03%      | 87.31%    | 39.72% |
| Verrucomicrobia    | 0.68%           | 0.52%           | 0.98%       | 0.87%       | 0.55%     | 3.21%  |
| Fungi              | Aged Piste Snow | Artificial snow | Fresh snow1 | Fresh snow2 | Pond pump | River  |
| Aaricomycetes      | 0.00%           | 0.86%           | 1.19%       | 1.21%       | 0.78%     | 1.16%  |
| Chytridiomycetes   | 0.00%           | 0.00%           | 0.00%       | 0.00%       | 0.00%     | 54.65% |
| Dothideomycetes    | 14.67%          | 13.66%          | 8.65%       | 12.53%      | 0.00%     | 6.98%  |
| Eurotiomycetes     | 13.24%          | 11.69%          | 20.07%      | 18.52%      | 0.00%     | 0.00%  |
| Lecanormycetes     | 34.78%          | 32.41%          | 48.07%      | 30.27%      | 0.00%     | 0.00%  |
| Leotiomycetes      | 4.91%           | 5.91%           | 7.47%       | 10.78%      | 0.41%     | 5.81%  |
| Rhizophydiomycetes | 0.00%           | 1.78%           | 0.00%       | 0.00%       | 14.08%    | 4.65%  |
| Sordariomycetes    | 1.28%           | 2.08%           | 3.14%       | 5.87%       | 0.00%     | 0.00%  |
| Tremellomycetes    | 4.99%           | 0.81%           | 1.97%       | 8.00%       | 0.00%     | 4.65%  |
| unidentified       | 26.12%          | 3079%           | 9.44%       | 12.81%      | 84.74%    | 22.09% |

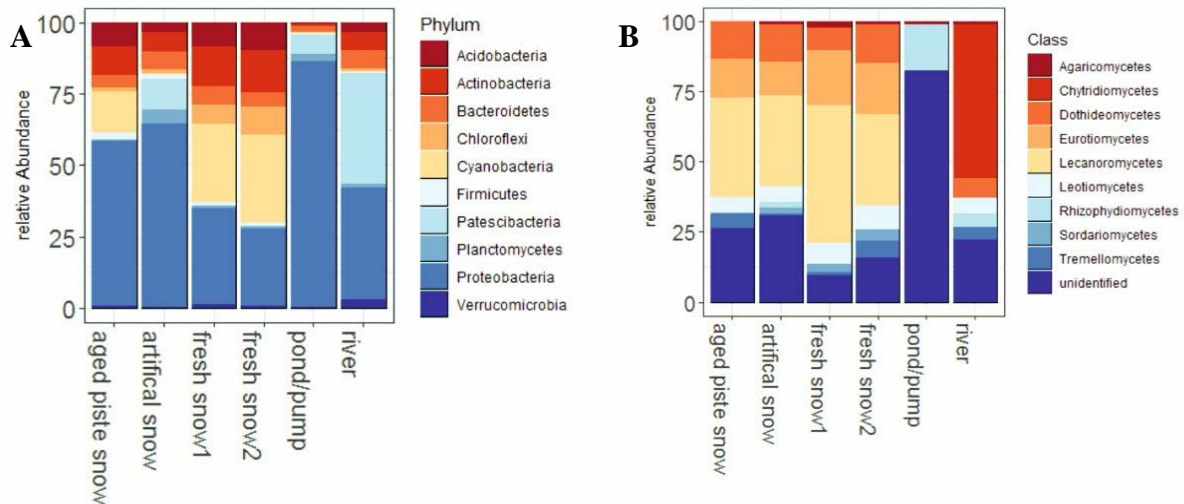

**SI-Figure 1: A) % relative Abundance of ten most abundant bacterial phyla and B) fungal classes for the different sample types**

The 10 most abundant phyla displayed high differences between the sample types. *Proteobacteria* were dominant for all samples, with the most prominent relative abundance in the pond/pump water (87.31%) and the lowest in fresh snow 2 (27.03%). Most prominently *Cyanobacteria* ranged from 13.9% in piste snow to 31.34% in fresh snow and only 0.31% to 0.82% in pond, river and artificial snow, predominantly driving differences to artificial snow and its sources. *Patescibacteria* were especially driving the difference of river bacterial communities (36.36%) compared to all other sample types (reaching 10.39% in artificial snow and 0.04% in natural snow). Further *Actinobacteria* accounted to 14.69% (fresh snow 2) to 10.05% (piste) in natural snow samples compared to 1.19% to 6.98% in pond/pump resp. river water. *Firmicutes* were highest in piste snow (2.48%). *Planctomycetes* had the highest abundance in artificial snow (4.93%).

The 10 most abundant fungal classes show a similar composition in fresh snow 1&2, piste snow and also artificial snow with a high share of *Lecanoromycetes* (48.07%-30.27%) and *Eurotiomycetes* (11.69%-20.07%) and *Dothideomycetes* (8.65%-14.67%), that are absent in pond/pump and river water (i.e *Lecanoromycetes*, *Eurotiomycetes* ). Pond/pump shows a high share of *unidentified* (84.74%) and *Rhizophydiomycetes* (14.08%), while river water is high in *Chytridiomycetes* (54.65%) that are absent in all other samples.

**SI-Table 3: Kruskal-Wallis Test statistics for Sample Types group comparison, asteriks (\*) mark significant values**

| Kruskal Wallis Test<br>~Sample Type | p-value (alpha=0.05) | X <sup>2</sup>          | df |
|-------------------------------------|----------------------|-------------------------|----|
| Chao1 (bacteria)                    | P=0.03*              | X <sup>2</sup> =12.3235 | 5  |
| Shannon (bacteria)                  | P=0.02*              | X <sup>2</sup> =13.2353 | 5  |
| InvSimpson (bacteria)               | P=0.04*              | X <sup>2</sup> =11.8529 | 5  |
| Chao1 (fungi)                       | P=0.03*              | X <sup>2</sup> =12.2059 | 5  |
| Shannon (fungi)                     | P=0.17               | X <sup>2</sup> =7.6765  | 5  |
| InvSimpson (fungi)                  | P=0.16               | X <sup>2</sup> =7.8529  | 5  |
| 16S mL-1                            | P=0.03*              | X <sup>2</sup> =12.4412 | 5  |
| 18S mL-1                            | P=0.13               | X <sup>2</sup> =8.5588  | 5  |
| 16S to 18S ratio                    | P=0.03*              | X <sup>2</sup> =12.1471 | 5  |
| DOC                                 | P=0.02*              | X <sup>2</sup> =13.4444 | 5  |
| DN                                  | P=0.01*              | X <sup>2</sup> =15.5882 | 5  |
| Cl                                  | P=0.18               | X <sup>2</sup> =7.5882  | 5  |
| NO3                                 | P=0.01*              | X <sup>2</sup> =15.3268 | 5  |
| SO4                                 | P=0.02*              | X <sup>2</sup> =13.0319 | 5  |
| Na                                  | P=0.56               | X <sup>2</sup> =3.9477  | 5  |
| NH4                                 | P=0.02*              | X <sup>2</sup> =13.5656 | 5  |
| K                                   | P=0.02*              | X <sup>2</sup> =12.8693 | 5  |
| Mg                                  | P=0.03*              | X <sup>2</sup> =12.4663 | 5  |
| Ca                                  | P=0.01*              | X <sup>2</sup> =14.3822 | 5  |

**SI-Table 4: Dunns Post Hoc Pairwise Test, no p-value correction applied (when applied no significant p values were obtained), asteriks mark significant p values**

| Comparisons                       | Chao1*<br>(bact) | Shannon<br>* (bact) | InvSimp<br>(bact)* | Chao1*<br>(fungi) | Shannon<br>(fungi) | InvSimp<br>(fungi) |        |
|-----------------------------------|------------------|---------------------|--------------------|-------------------|--------------------|--------------------|--------|
| aged piste snow - artificial snow | 0.003*           | 0.019*              | 0.051              | 0.012*            | 0.151              | 0.099              |        |
| aged piste snow - fresh snow1     | 0.220            | 0.151               | 0.431              | 0.072             | 0.431              | 0.431              |        |
| artificial snow - fresh snow1     | 0.024*           | 0.151               | 0.072              | 0.220             | 0.195              | 0.132              |        |
| aged piste snow - fresh snow2     | 0.029*           | 0.061               | 0.334              | 0.099             | 0.365              | 0.274              |        |
| artificial snow - fresh snow2     | 0.195            | 0.303               | 0.114              | 0.172             | 0.085              | 0.029*             |        |
| fresh snow1 - fresh snow2         | 0.132            | 0.303               | 0.398              | 0.431             | 0.303              | 0.220              |        |
| aged piste snow - pond/pump       | 0.274            | 0.220               | 0.085              | 0.000*            | 0.029*             | 0.085              |        |
| artificial snow - pond/pump       | 0.016*           | 0.002*              | 0.001*             | 0.132             | 0.195              | 0.465              |        |
| fresh snow1 - pond/pump           | 0.431            | 0.035*              | 0.061              | 0.029*            | 0.043*             | 0.114              |        |
| fresh snow2 - pond/pump           | 0.099            | 0.010*              | 0.035*             | 0.019*            | 0.012*             | 0.024*             |        |
| aged piste snow - river           | 0.010*           | 0.022*              | 0.057              | 0.101             | 0.072              | 0.057              |        |
| artificial snow - river           | 0.358            | 0.292               | 0.335              | 0.380             | 0.233              | 0.252              |        |
| fresh snow1 - river               | 0.039*           | 0.101               | 0.072              | 0.404             | 0.091              | 0.072              |        |
| fresh snow2 - river               | 0.165            | 0.181               | 0.101              | 0.358             | 0.044*             | 0.022*             |        |
| pond/pump - river                 | 0.030*           | 0.005*              | 0.005*             | 0.137             | 0.451              | 0.272              |        |
| Comparisons                       | 16S*             | 18S                 | 16S:18S*           | DOC*              | DN*                | CI                 | NO3*   |
| aged piste snow - artificial snow | 0.085            | 0.072               | 0.008*             | 0.045*            | 0.233              | 0.147              | 0.053  |
| aged piste snow - fresh snow1     | 0.274            | 0.043*              | 0.152              | 0.314             | 0.073              | 0.343              | 0.001* |
| artificial snow - fresh snow1     | 0.024*           | 0.398               | 0.085              | 0.113             | 0.015*             | 0.259              | 0.073  |
| aged piste snow - fresh snow2     | 0.334            | 0.303               | 0.334              | 0.404             | 0.233              | 0.286              | 0.010* |
| artificial snow - fresh snow2     | 0.036*           | 0.173               | 0.024*             | 0.073             | 0.073              | 0.314              | 0.233  |
| fresh snow1 - fresh snow2         | 0.432            | 0.115               | 0.274              | 0.404             | 0.233              | 0.436              | 0.233  |
| aged piste snow - pond            | 0.013*           | 0.220               | 0.002*             | 0.003*            | 0.073              | 0.008*             | 0.187  |
| artificial snow - pond            | 0.196            | 0.013*              | 0.334              | 0.147             | 0.233              | 0.085              | 0.233  |
| fresh snow1 - pond                | 0.002*           | 0.006*              | 0.036*             | 0.012*            | 0.002*             | 0.022*             | 0.015* |
| fresh snow2 - pond                | 0.004*           | 0.099               | 0.008*             | 0.006*            | 0.015*             | 0.031*             | 0.073  |
| aged piste snow - river           | 0.198            | 0.452               | 0.198              | 0.011*            | 0.033*             | 0.079              | 0.428  |
| artificial snow - river           | 0.452            | 0.182               | 0.198              | 0.224             | 0.116              | 0.319              | 0.052  |
| fresh snow1 - river               | 0.101            | 0.138               | 0.452              | 0.033*            | 0.001*             | 0.147              | 0.002* |
| fresh snow2 - river               | 0.125            | 0.404               | 0.293              | 0.020*            | 0.006*             | 0.183              | 0.011* |
| pond - river                      | 0.233            | 0.252               | 0.125              | 0.428             | 0.294              | 0.224              | 0.164  |
| Comparisons                       | SO4*             | Na                  | NH4*               | K*                | Mg*                | Cl*                |        |
| aged piste snow - artificial snow | 0.012*           | 0.038*              | 0.053              | 0.073             | 0.062              | 0.197              |        |
| aged piste snow - fresh snow1     | 0.259            | 0.286               | 0.085              | 0.286             | 0.373              | 0.197              |        |
| artificial snow - fresh snow1     | 0.053            | 0.113               | 0.404              | 0.022*            | 0.031*             | 0.044*             |        |
| aged piste snow - fresh snow2     | 0.209            | 0.113               | 0.085              | 0.187             | 0.343              | 0.165              |        |
| artificial snow - fresh snow2     | 0.073            | 0.286               | 0.404              | 0.010*            | 0.026*             | 0.034*             |        |
| fresh snow1 - fresh snow2         | 0.436            | 0.259               | 0.500              | 0.373             | 0.468              | 0.452              |        |
| aged piste snow - pond            | 0.004*           | 0.166               | 0.000*             | 0.045*            | 0.026*             | 0.034*             |        |
| artificial snow - pond            | 0.343            | 0.209               | 0.038*             | 0.404             | 0.343              | 0.165              |        |
| fresh snow1 - pond                | 0.022*           | 0.343               | 0.022*             | 0.012*            | 0.012*             | 0.004*             |        |
| fresh snow2 - pond                | 0.031*           | 0.404               | 0.022*             | 0.005*            | 0.009*             | 0.003*             |        |
| aged piste snow - river           | 0.006*           | 0.097               | 0.006*             | 0.079             | 0.033*             | 0.051              |        |
| artificial snow - river           | 0.319            | 0.386               | 0.147              | 0.457             | 0.319              | 0.192              |        |
| fresh snow1 - river               | 0.028*           | 0.213               | 0.103              | 0.028*            | 0.016*             | 0.008*             |        |
| fresh snow2 - river               | 0.038*           | 0.414               | 0.103              | 0.014*            | 0.014*             | 0.006*             |        |
| pond - river                      | 0.457            | 0.332               | 0.294              | 0.457             | 0.457              | 0.500              |        |

NOAA HYSPLIT MODEL  
 Backward trajectories ending at 1000 UTC 22 Feb 18  
 GDAS Meteorological Data

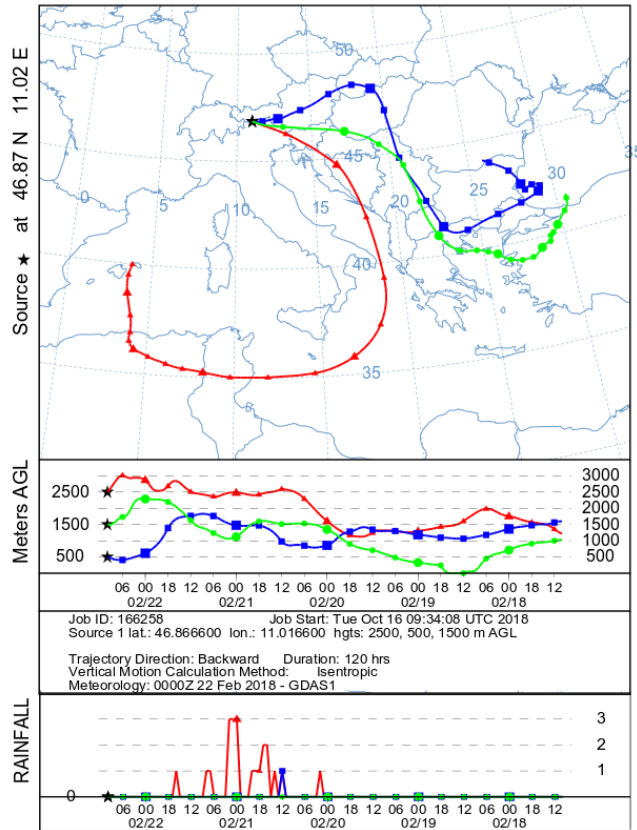

**SI-Figure 2: 120hrs Hysplit backtrajectory of air masses for the time of snow precipitation in Obergurgl that was sampled as fresh snow and aged piste snow for 2500m, 1500m and 500m AGL arrival height**

**SI-Table 5: Sequence Statistics**

|                                  | <i>Bacteria</i> | <i>Fungi</i>   |
|----------------------------------|-----------------|----------------|
| <i>#raw sequences per sample</i> | 25268+/-9307    | 31183+/- 12789 |
| <i>OTUs raw dataset</i>          | 5947            | 1476           |
| <i>OTUs after blank removal</i>  | 5874            | 992            |
| <i>Most abundant 97% OTUs</i>    | 3095            | 940            |
| <i>Merged on genus level</i>     | 958             | 326            |
| <i>Rarefied</i>                  | 956             | --             |

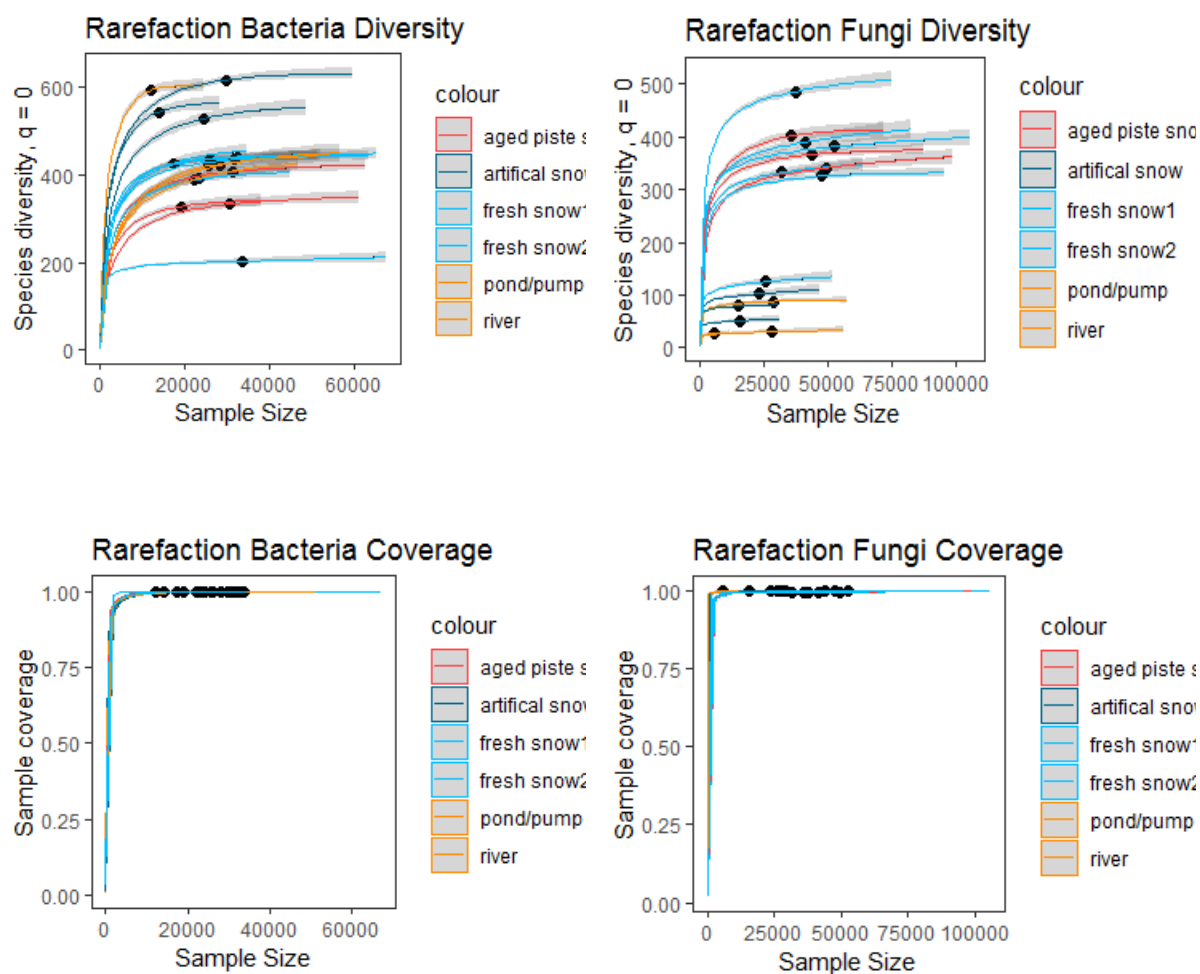

**SI-Figure 3: Diversity and Coverage Rarefaction for Bacteria and Fungi sequences**

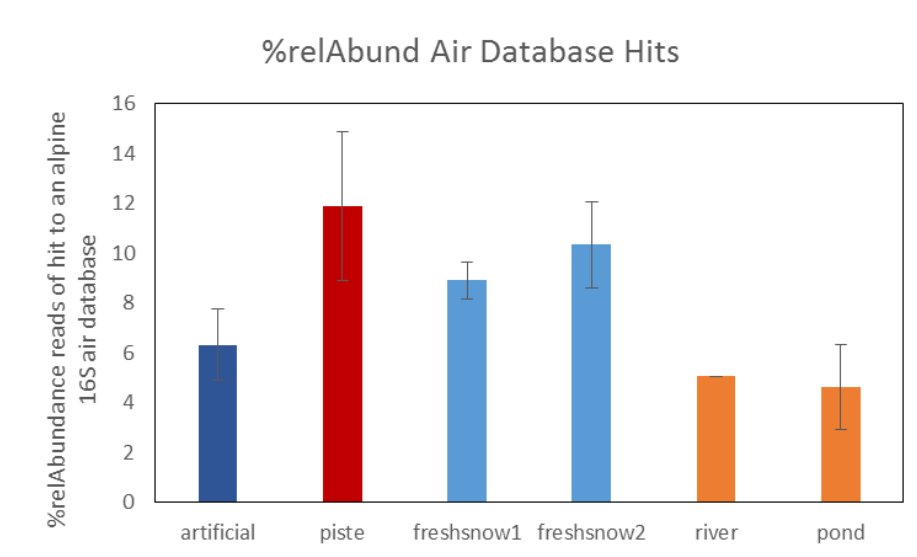

**SI-Figure 4: Relative abundance of total reads for each sample type being a hit to an alpine air 16S database, air database from alpine air sequences of Els et al., 2019 and Els et al., (in review)**

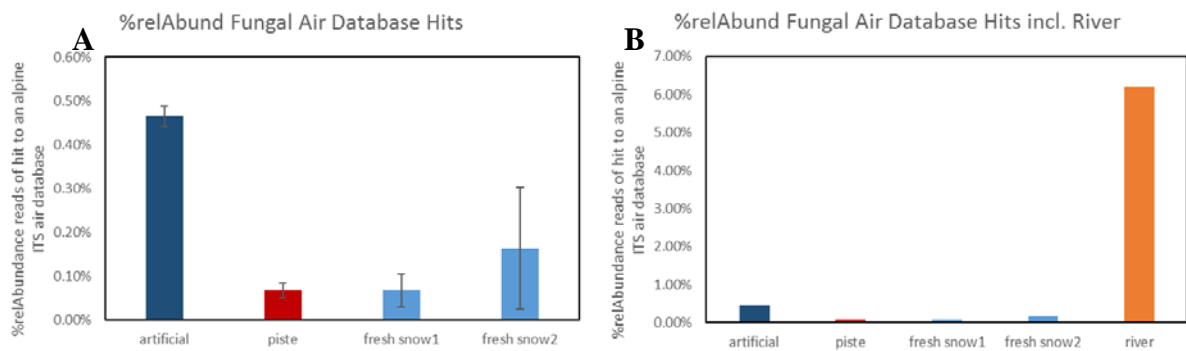

**SI-Figure 5 Relative abundance of total reads for each sample type being a hit to an alpine air ITS database, A) only snow samples, B) including the river sample, air database from alpine air sequences of Els et al., 2019 and Els et al., (in review)**

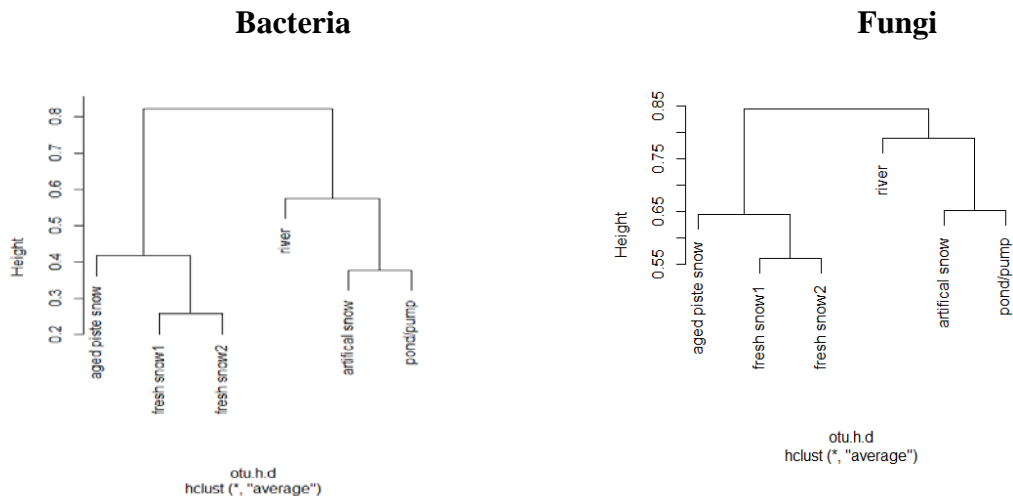

**SI-Figure 6: Cluster Dendrogram, hellingertransf. bray, average clustering of merged sample types**

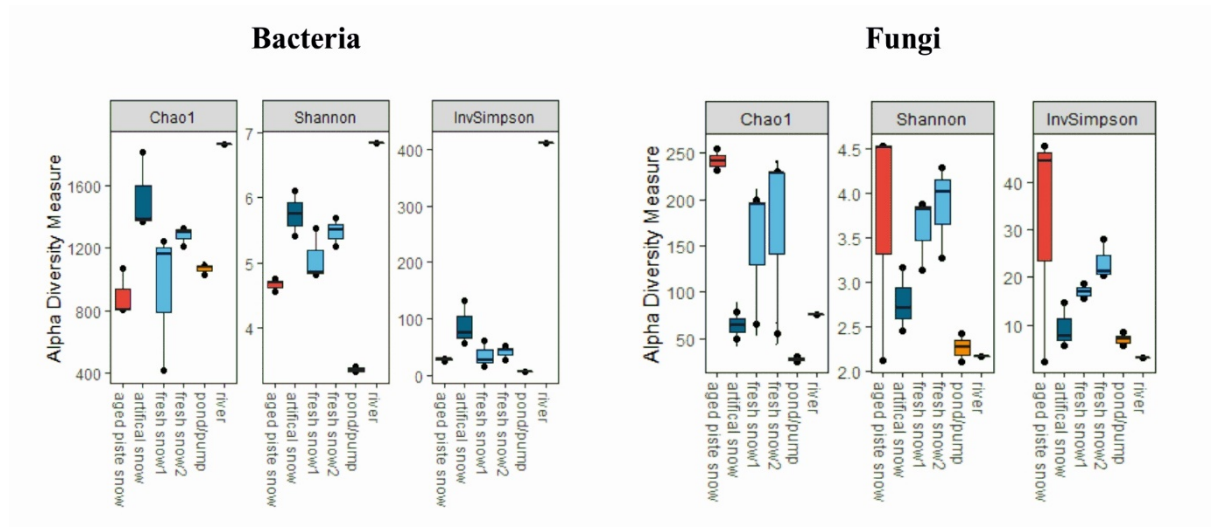

**SI-Figure 7: Alpha diversity metrics**



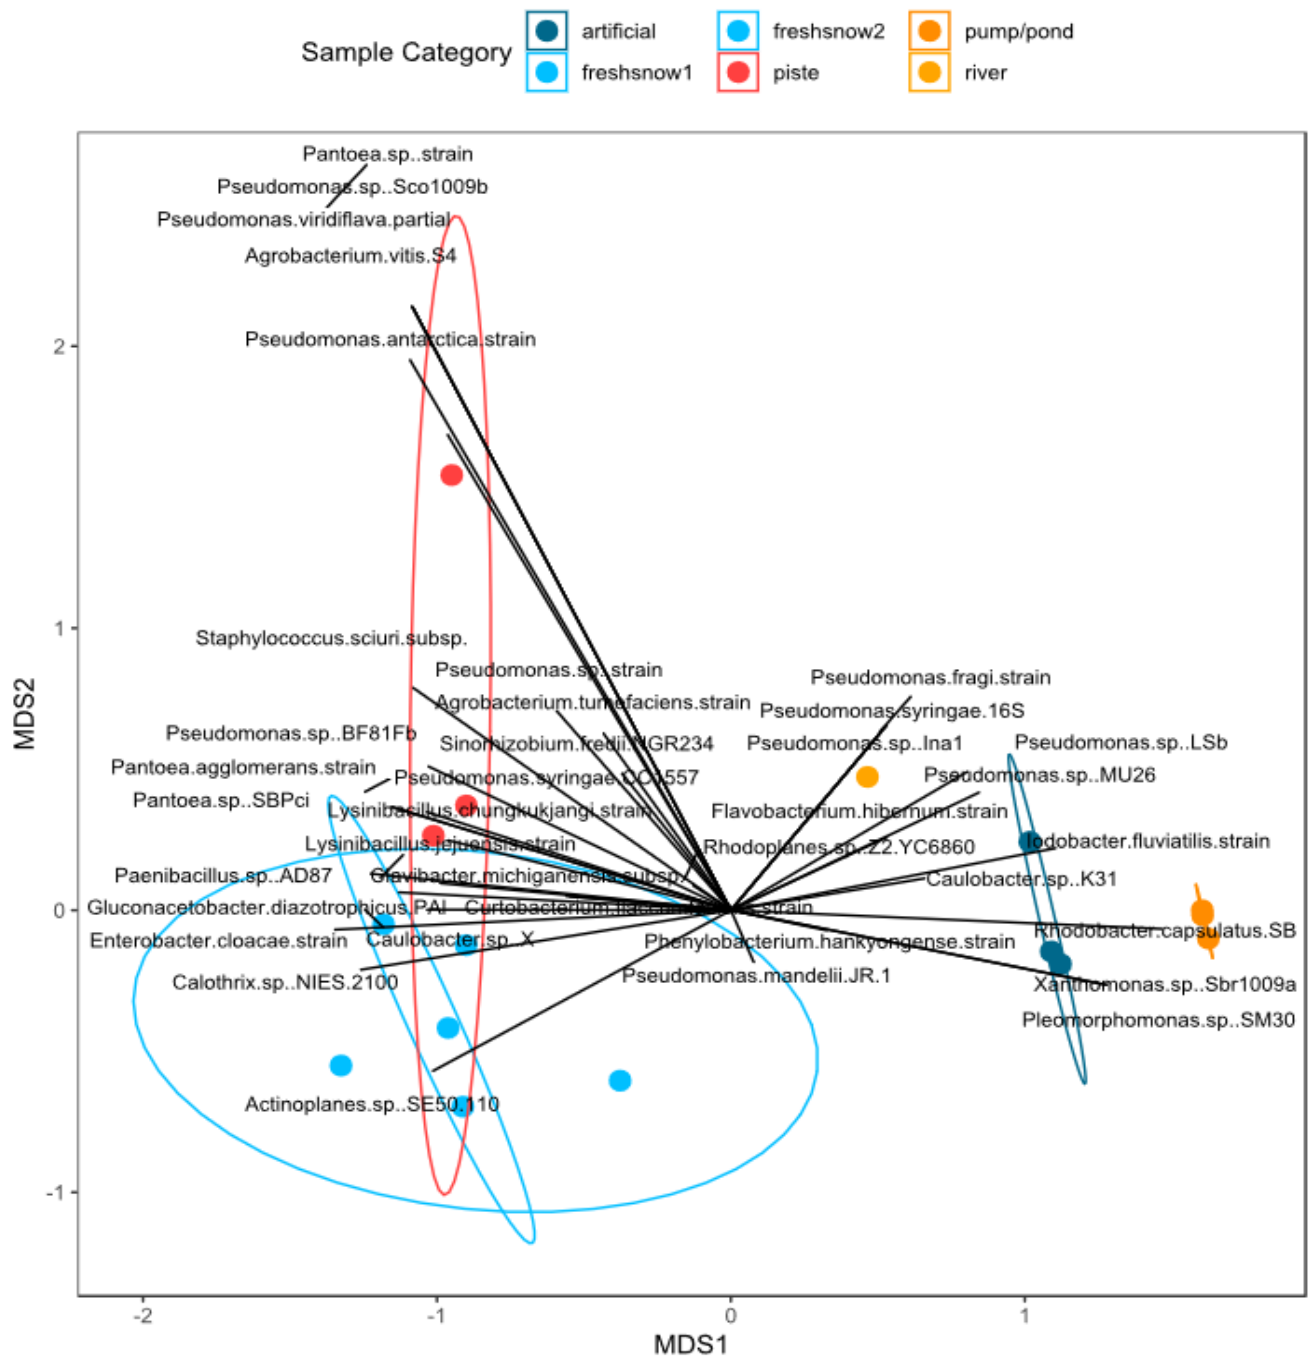

**SI-Figure 8: NMDS of closest hits to ice nucleation database on strain level**

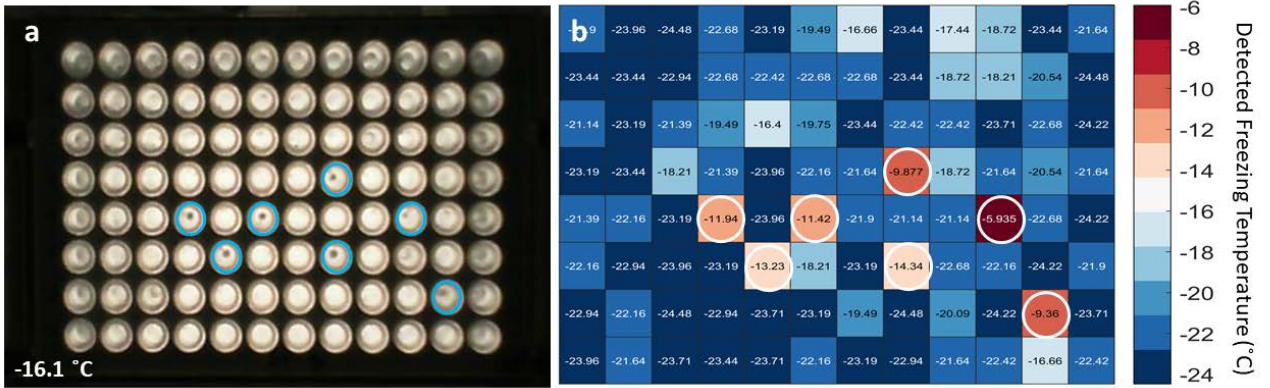

**SI-Figure 9: DRINCZ setup with the highest freezing temperature clustering in the middle of the sample tray indicating uneven heat distribution to the aged piste snow sample.**

| Sample               | DOC<br>µg/L | DN<br>µg/L | Cl <sup>-</sup><br>mg/L | NO <sub>3</sub> <sup>+</sup><br>mg/L | SO <sub>4</sub> <sup>2+</sup><br>mg/L | Na <sup>+</sup><br>mg/L | NH <sub>4</sub> <sup>+</sup><br>mg/L | K <sup>+</sup><br>mg/L | Mg <sup>2+</sup><br>mg/L | Ca <sup>2+</sup><br>mg/L |
|----------------------|-------------|------------|-------------------------|--------------------------------------|---------------------------------------|-------------------------|--------------------------------------|------------------------|--------------------------|--------------------------|
| River #1_1           | 466         | 214        | 0.332                   | 0.198                                | 65.000                                | 1.366                   | 0.009                                | 4.514                  | 7.658                    | 35.000                   |
| River #1_2           | 303         | 152        | 0.230                   | 0.139                                | 48.000                                | 1.016                   | 0.006                                | 3.412                  | 5.865                    | 29.000                   |
| Natural Snow #1_1    | 611         | 547        | 0.488                   | 0.499                                | 0.554                                 | 0.311                   | 0.036                                | 0.043                  | 0.030                    | 0.456                    |
| Natural Snow #1_2    | 598         | 563        | 0.256                   | 0.523                                | 0.519                                 | 0.134                   | 0.041                                | 0.037                  | 0.026                    | 0.359                    |
| Natural Snow #1_3    | 2672        | 1074       | 6.687                   | 0.572                                | 1.255                                 | 3.943                   | 0.065                                | 0.097                  | 0.281                    | 0.552                    |
| Natural Snow #2_1    | 729         | 514        | 0.132                   | 0.464                                | 0.524                                 | 0.042                   | 0.031                                | 0.035                  | 0.024                    | 0.381                    |
| Natural Snow #2_2    | 693         | 424        | 2.929                   | 0.370                                | 1.017                                 | 1.867                   | 0.054                                | 0.045                  | 0.057                    | 0.524                    |
| Natural Snow #2_3    | 763         | 502        | 2.143                   | 0.434                                | 0.767                                 | 1.269                   | 0.044                                | 0.059                  | 0.115                    | 0.398                    |
| Artificial Snow #1_1 | 553         | 330        | 0.411                   | 0.281                                | 45.000                                | 1.321                   | 0.042                                | 3.668                  | 5.132                    | 17.986                   |
| Artificial Snow #1_2 | 576         | 309        | 0.444                   | 0.272                                | 45.000                                | 1.231                   | 0.049                                | 3.652                  | 5.180                    | 17.417                   |
| Artificial Snow #1_3 | 470         | 301        | 0.286                   | 0.277                                | 54.000                                | 1.262                   | 0.015                                | 4.303                  | 6.132                    | 18.798                   |
| Aged Piste Snow #1_1 | 834         | 365        | 0.612                   | 0.202                                | 0.577                                 | 0.367                   | 0.088                                | 0.076                  | 0.100                    | 0.654                    |
| Aged Piste Snow #1_2 | 656         | 371        | 0.619                   | 0.196                                | 0.457                                 | 0.355                   | 0.091                                | 0.064                  | 0.086                    | 0.524                    |
| Aged Piste Snow #1_3 | 775         | 367        | 0.551                   | 0.193                                | 0.494                                 | 0.334                   | 0.092                                | 0.066                  | 0.100                    | 0.556                    |
| Pumping Station #1_1 | 398         | 270        | 0.222                   | 0.258                                | 53.000                                | 1.045                   | 0.005                                | 3.702                  | 6.003                    | 33.000                   |
| Pumping Station #1_2 | 299         | 263        | 0.226                   | 0.254                                | 52.000                                | 1.043                   | 0.000                                | 3.691                  | 5.989                    | 33.000                   |
| Pumping Station #1_3 | 324         | 262        | 0.203                   | 0.248                                | 52.000                                | 1.034                   | 0.000                                | 3.693                  | 5.983                    | 33.000                   |

**SI-Table 6: Water chemistry values of snow and water samples**
